# Supplementary material for: Coagulation factors VII, IX and X are effective antibacterial proteins against drug-resistant Gram-negative bacteria
Source: PubMed Central journal article supplement (PMC6796875; doi:10.1038/s41422-019-0202-3), 2019-08-09
Supplement: 41422_2019_202_MOESM2_ESM.pdf [file 41422_2019_202_MOESM2_ESM.pdf]

## Supplementary information, Figure S2

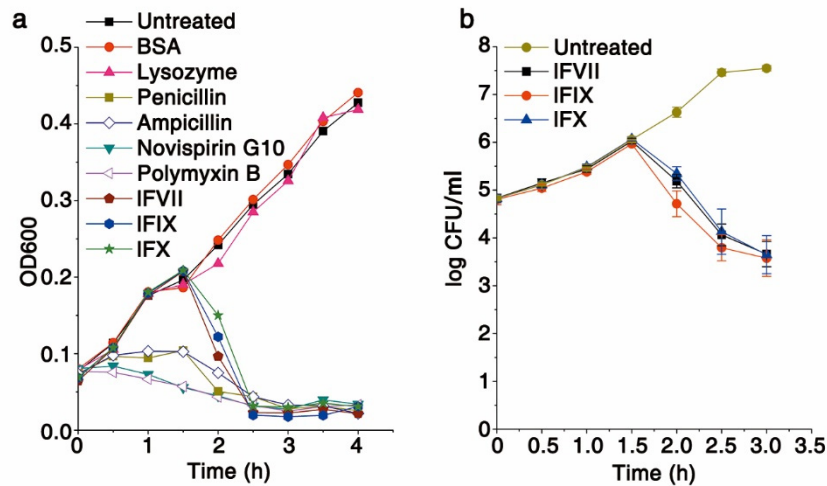

**Fig. S2** Antibacterial effects of the LCs towards *E. coli* DH5α. **a** Growth kinetic measurements of *E. coli*

DH5α exposed to the LCs (4× MIC), BSA and other antibiotics with known cellular targets placed the LCs

into the cluster of cell envelope-targeting agents. Data represent mean values from four independent

experiments. **b** Killing kinetics of the LCs. The kinetic cell death of *E. coli* DH5α in LB was detected

following its treatment with the LCs (4× MIC). Error bars represent SD (n=4). Untreated bacteria were

included in all experiments. The final concentrations of different agents are listed as follows: BSA, 100

µg/ml; lysozyme, 50 µg/ml; penicillin, 100 µg/ml; ampicillin, 250 µg/ml; novispirin G10, 10 µg/ml;

polymyxin B, 10 µg/ml; IFVII, 100 µg/ml; IFIX, 100 µg/ml; IFX, 100 µg/ml.
