# Supplementary material for: Coagulation factors VII, IX and X are effective antibacterial proteins against drug-resistant Gram-negative bacteria
Source: PubMed Central journal article supplement (PMC6796875; doi:10.1038/s41422-019-0202-3), 2019-08-09
Supplement: 41422_2019_202_MOESM3_ESM.pdf [file 41422_2019_202_MOESM3_ESM.pdf]

## Supplementary information, Figure S3

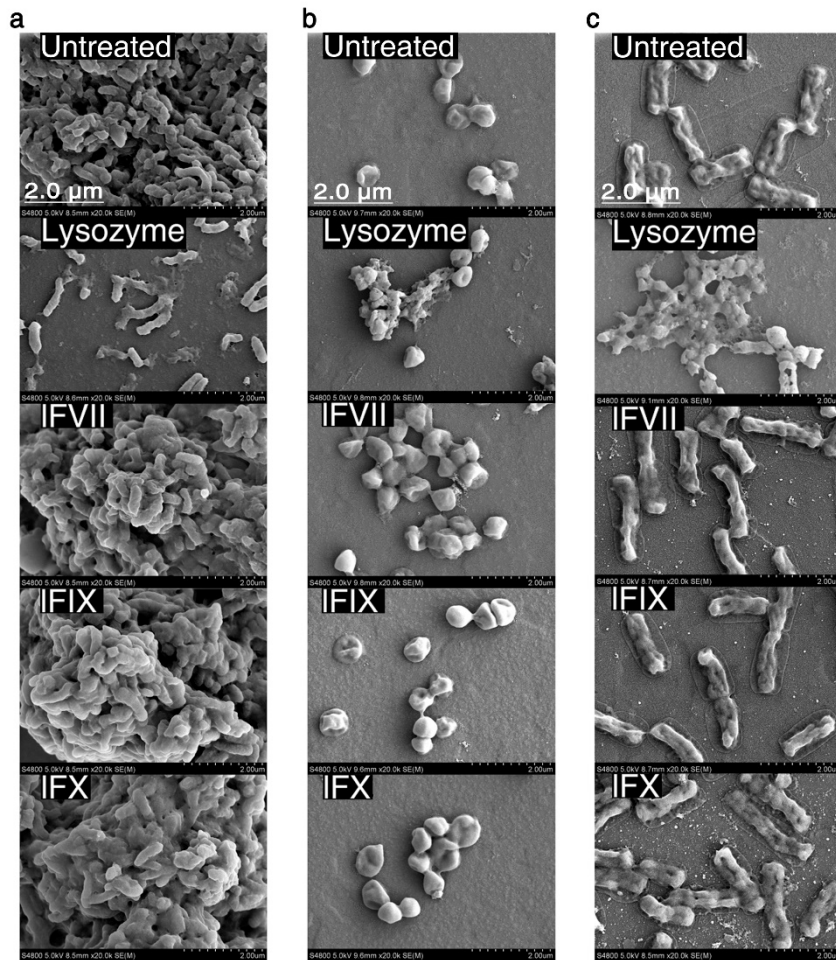

**Fig. S3** LCs do not cause the degradation of PGN. PGN of *E. coli* K12 (a), *Staphylococcus aureus* (b) and *Bacillus subtilis* (c) in TBS were incubated for 3 h at 37 °C with the LCs or lysozyme, washed with TBS, and then scanned by SEM. Untreated PGN was included in all experiments. The final concentrations of the LCs and lysozyme are listed as follows: lysozyme, 50 μg/ml; IFVII, 100 μg/ml; IFIX, 100 μg/ml; IFX, 100 μg/ml.
