# Supplementary material for: Coagulation factors VII, IX and X are effective antibacterial proteins against drug-resistant Gram-negative bacteria
Source: PubMed Central journal article supplement (PMC6796875; doi:10.1038/s41422-019-0202-3), 2019-08-09
Supplement: 41422_2019_202_MOESM6_ESM.pdf [file 41422_2019_202_MOESM6_ESM.pdf]

## Supplementary information, Figure S6

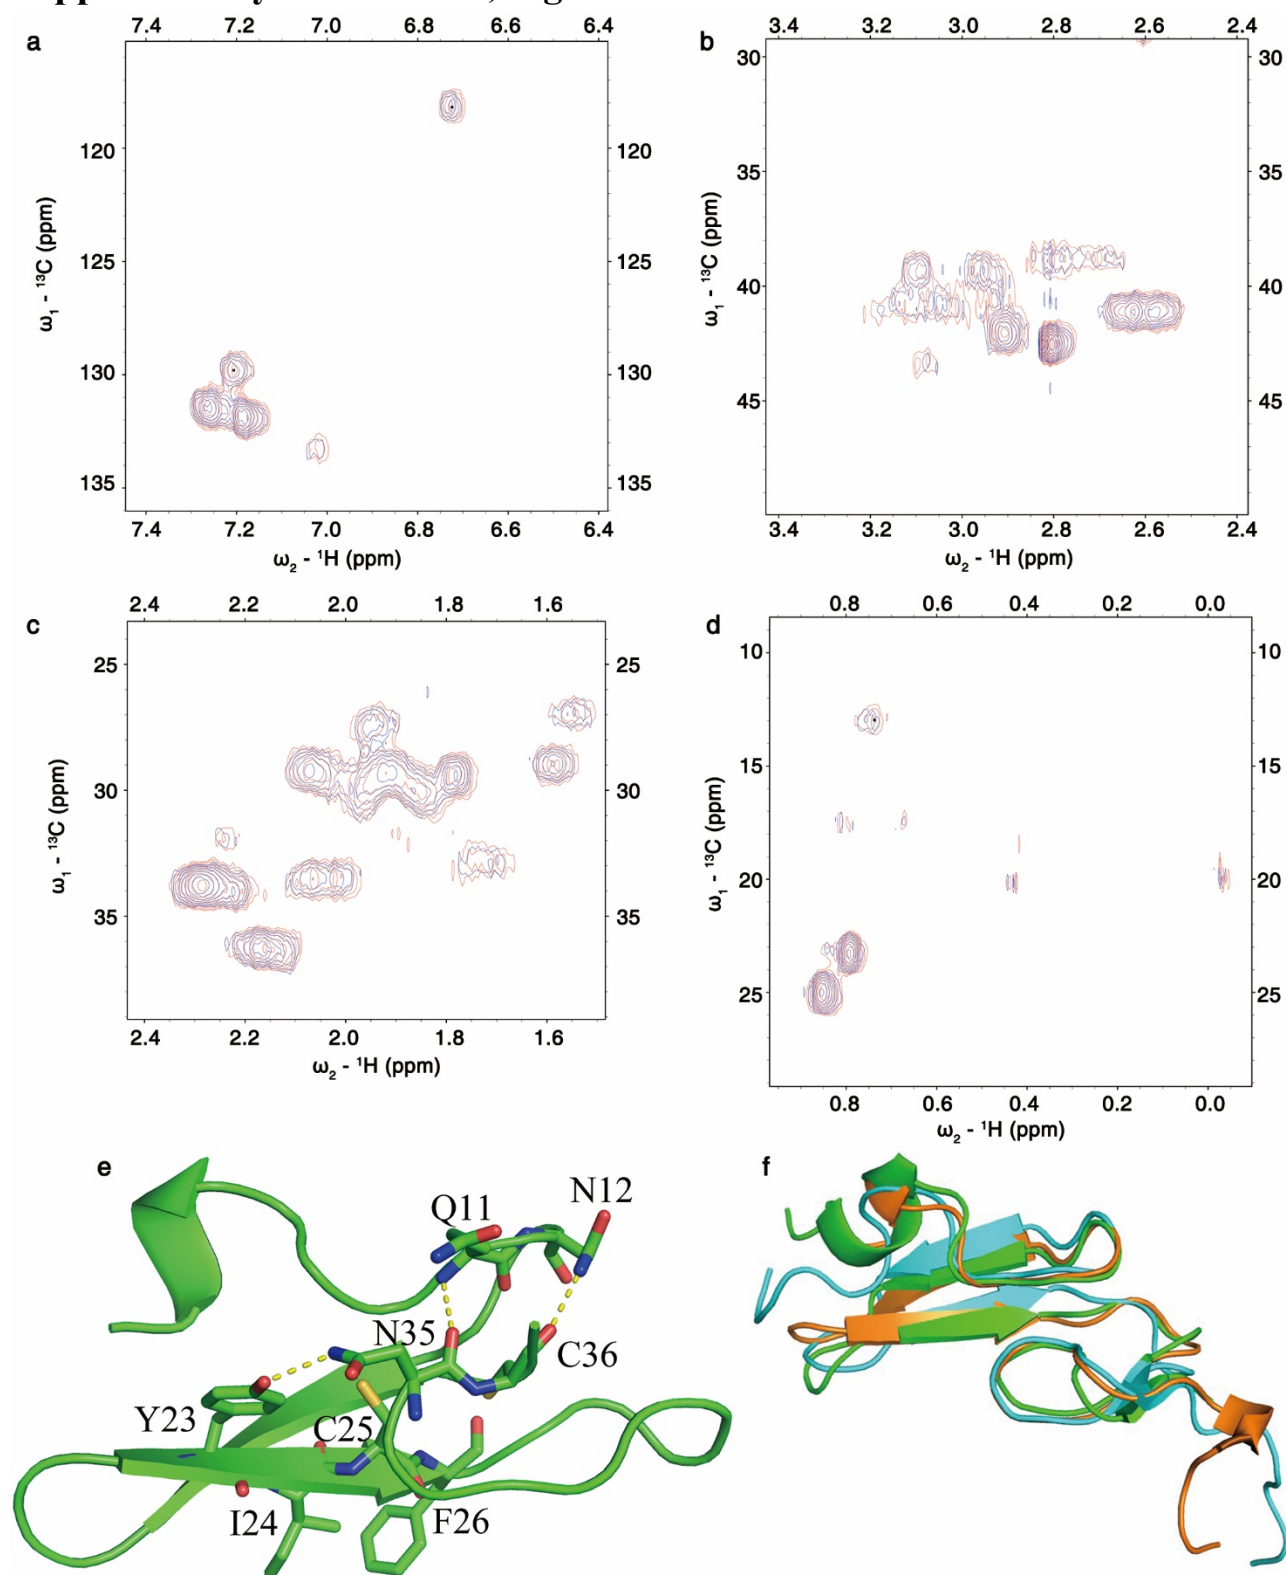

**Fig. S6** Residues critical for the antibacterial activity of IFVII. **a-d** NMR titration spectra corresponding to the regions of side-chains of tyrosine and phenylalanine (**a**), asparagine and cysteine (**b**), glutamine (**c**) and isoleucine (**d**) were enlarged, respectively. **e** The hydrogen bonds network involving sequences Q<sub>11</sub>N<sub>12</sub>, Y<sub>23</sub>I<sub>24</sub>C<sub>25</sub>F<sub>26</sub> and N<sub>35</sub>C<sub>36</sub>. **f** Structure comparison of EGF1 domain of FVII in crystal (PDB ID: 1QFK, orange) and solution (PDB ID: 1BF9, green; PDB: 1F7M, cyan).
