# Supplementary material for: Coagulation factors VII, IX and X are effective antibacterial proteins against drug-resistant Gram-negative bacteria
Source: PubMed Central journal article supplement (PMC6796875; doi:10.1038/s41422-019-0202-3), 2019-08-09
Supplement: 41422_2019_202_MOESM8_ESM.pdf [file 41422_2019_202_MOESM8_ESM.pdf]

## Supplementary information, Figure S8

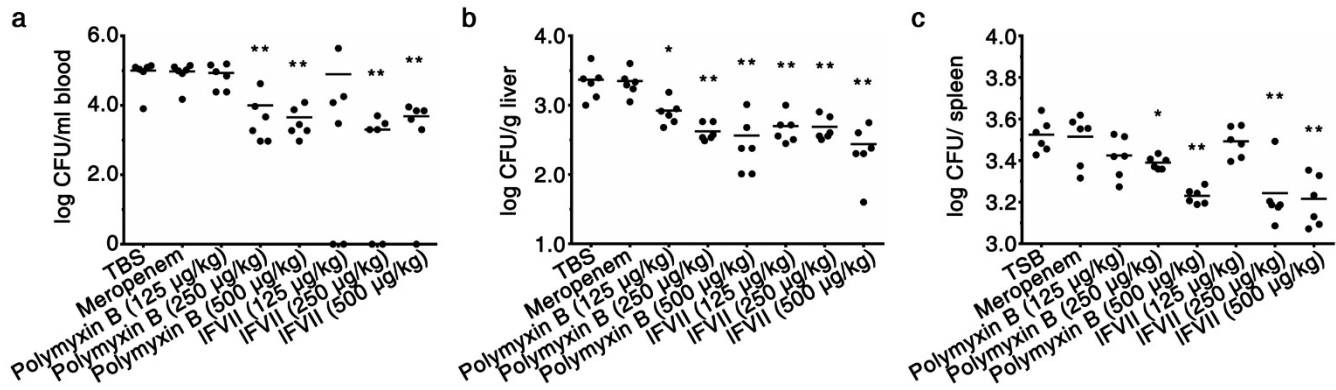

**Fig. S8** *In vivo* efficacy of the IFVII against XDR *A. baumannii* infection. Thirty minutes after intravenous inoculation of  $2 \times 10^8$  CFU of the XDR *A. baumannii* Ab3, groups of six mice were injected intravenously with saline, meropenem (40 mg/kg), polymyxin B, and IFVII. The dose of polymyxin B and IFVII were increased as indicated. Bacterial titers remaining in blood (a), liver (b), and spleen (c) were assayed at 24 h post injection of different agents. Bars indicate the mean values (n=6). \* $P < 0.05$  and \*\* $P < 0.01$ , significantly different from the saline-injected group.
