# Supplementary material for: Coagulation factors VII, IX and X are effective antibacterial proteins against drug-resistant Gram-negative bacteria
Source: PubMed Central journal article supplement (PMC6796875; doi:10.1038/s41422-019-0202-3), 2019-08-09
Supplement: 41422_2019_202_MOESM10_ESM.pdf [file 41422_2019_202_MOESM10_ESM.pdf]

# Supplementary information, Figure S10

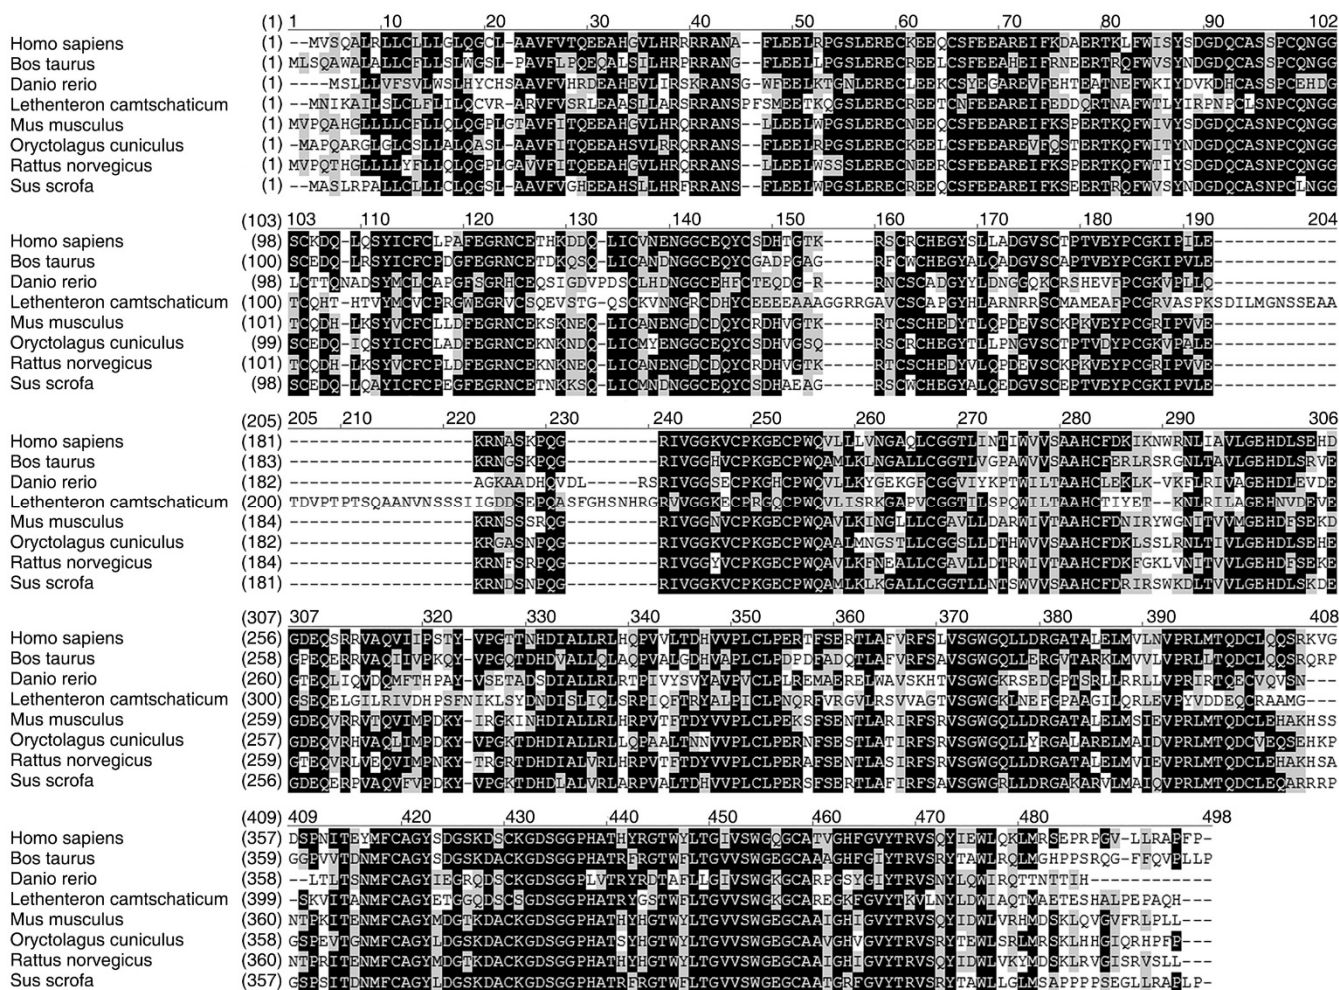

**Fig. S10** Conservation of FVII in different vertebrates. Sequence alignment was carried out using Vector

Advance 11 (Invitrogen).
