# Supplementary material for: Coagulation factors VII, IX and X are effective antibacterial proteins against drug-resistant Gram-negative bacteria
Source: PubMed Central journal article supplement (PMC6796875; doi:10.1038/s41422-019-0202-3), 2019-08-09
Supplement: 41422_2019_202_MOESM12_ESM.pdf [file 41422_2019_202_MOESM12_ESM.pdf]

## Supplementary information, Table S1

**Table S1** Antibacterial activities of IFVII, colistin and vancomycin towards the *A. baumannii* Ab3 (LPS+) and LPS-deficient *A. baumannii* Ab3 (LPS-). The MBC value is defined as the minimum drug concentration that causes quantitative bacterial cell death. All data are expressed as mean values  $\pm$  SD (n=4).

| Bacteria type       | Code/name | IFVII ( $\mu$ M) |                 | colistin ( $\mu$ M) |                  | Vancomycin ( $\mu$ M) |                 |
|---------------------|-----------|------------------|-----------------|---------------------|------------------|-----------------------|-----------------|
|                     |           | LPS+             | LPS-            | LPS+                | LPS-             | LPS+                  | LPS-            |
| <i>A. baumannii</i> | Ab3 (XDR) | 0.37 $\pm$ 0.10  | 3.57 $\pm$ 0.94 | 0.30 $\pm$ 0.10     | 10.46 $\pm$ 5.00 | 20.39 $\pm$ 10.14     | 0.30 $\pm$ 0.12 |
