# Supplementary material for: Coagulation factors VII, IX and X are effective antibacterial proteins against drug-resistant Gram-negative bacteria
Source: PubMed Central journal article supplement (PMC6796875; doi:10.1038/s41422-019-0202-3), 2019-08-09
Supplement: 41422_2019_202_MOESM13_ESM.pdf [file 41422_2019_202_MOESM13_ESM.pdf]

## Supplementary information, Table S2

**Table S2 Bacterial strains, cell lines and plasmid used in this study.**

| Bacterial strains                         |                    |               |
|-------------------------------------------|--------------------|---------------|
| <i>Escherichia coli</i> BL21(DE3)         | Invitrogen         | Cat# C600003  |
| <i>Escherichia coli</i> DH5 $\alpha$      | Invitrogen         | Cat# 18288019 |
| <i>Acinetobacter baumannii</i> ATCC 19606 | ATCC               | ATCC 19606    |
| <i>Acinetobacter baumannii</i> Ab3        | Chang et al., 2015 | N/A           |
| <i>Acinetobacter baumannii</i> Ab5        | Chang et al., 2015 | N/A           |
| <i>Acinetobacter baumannii</i> Ab16       | Chang et al., 2015 | N/A           |
| <i>Acinetobacter baumannii</i> Ab18       | Chang et al., 2015 | N/A           |
| <i>Acinetobacter baumannii</i> Ab30       | Chang et al., 2015 | N/A           |
| <i>Acinetobacter baumannii</i> Ab35       | Chang et al., 2015 | N/A           |
| <i>Acinetobacter baumannii</i> Ab42       | Chang et al., 2015 | N/A           |
| <i>Acinetobacter baumannii</i> Ab46       | Chang et al., 2015 | N/A           |
| <i>Acinetobacter baumannii</i> Ab48       | Chang et al., 2015 | N/A           |
| <i>Klebsiella pneumonia</i> ATCC 4352     | ATCC               | ATCC 4352     |
| <i>Enterobacter cloacae</i> Y1            | This study         | N/A           |
| <i>Pseudomonas aeruginosa</i> ATCC 27853  | ATCC               | ATCC 27853    |
| <i>Pseudomonas aeruginosa</i> L93         | This study         | N/A           |
| <i>Pseudomonas aeruginosa</i> PA3         | Chang et al., 2015 | N/A           |
| <i>Pseudomonas aeruginosa</i> PA4         | Chang et al., 2015 | N/A           |
| Cell lines                                |                    |               |
| CHO-DG44                                  | Invitrogen         | Cat# A1100001 |
| HepG2                                     | ATCC               | ATCC HB-8065  |
| Plasmids                                  |                    |               |
| pcDNA3.1(+)                               | Invitrogen         | N/A           |
| pET19b                                    | Novagen            | N/A           |
| pcDNA3.1-His-hFVII                        | This study         | N/A           |
| pcDNA3.1-His-FVII                         | This study         | N/A           |
| pcDNA3.1-His-FIX                          | This study         | N/A           |
| pcDNA3.1-His-FX                           | This study         | N/A           |
| pET19-IFVII                               | This study         | N/A           |
| pET19-IFIX                                | This study         | N/A           |
| pET19-IFX                                 | This study         | N/A           |
| pET19-mCherry-rTEV-FVII-Gla               | This study         | N/A           |
| pET19-mCherry-rTEV-FVII-EGF1              | This study         | N/A           |
| pET19-mCherry-rTEV-FVII-EGF2              | This study         | N/A           |
| pET19-mCherry-rTEV-FVII-EGF1 mut(D1G)     | This study         | N/A           |
| pET19-mCherry-rTEV-FVII-EGF1 mut(G2A)     | This study         | N/A           |
| pET19-mCherry-rTEV-FVII-EGF1 mut(D3G)     | This study         | N/A           |
| pET19-mCherry-rTEV-FVII-EGF1 mut(Q4G)     | This study         | N/A           |
| pET19-mCherry-rTEV-FVII-EGF1 mut(C5G)     | This study         | N/A           |
| pET19-mCherry-rTEV-FVII-EGF1 mut(A6G)     | This study         | N/A           |
| pET19-mCherry-rTEV-FVII-EGF1 mut(S7G)     | This study         | N/A           |
| pET19-mCherry-rTEV-FVII-EGF1 mut(S8G)     | This study         | N/A           |
| pET19-mCherry-rTEV-FVII-EGF1 mut(P9G)     | This study         | N/A           |

|                                       |            |     |
|---------------------------------------|------------|-----|
| pET19-mCherry-rTEV-FVII-EGF1mut(C10G) | This study | N/A |
| pET19-mCherry-rTEV-FVII-EGF1mut(Q11G) | This study | N/A |
| pET19-mCherry-rTEV-FVII-EGF1mut(N12G) | This study | N/A |
| pET19-mCherry-rTEV-FVII-EGF1mut(G13A) | This study | N/A |
| pET19-mCherry-rTEV-FVII-EGF1mut(G14A) | This study | N/A |
| pET19-mCherry-rTEV-FVII-EGF1mut(S15G) | This study | N/A |
| pET19-mCherry-rTEV-FVII-EGF1mut(C16G) | This study | N/A |
| pET19-mCherry-rTEV-FVII-EGF1mut(K17G) | This study | N/A |
| pET19-mCherry-rTEV-FVII-EGF1mut(D18G) | This study | N/A |
| pET19-mCherry-rTEV-FVII-EGF1mut(Q19G) | This study | N/A |
| pET19-mCherry-rTEV-FVII-EGF1mut(L20G) | This study | N/A |
| pET19-mCherry-rTEV-FVII-EGF1mut(Q21G) | This study | N/A |
| pET19-mCherry-rTEV-FVII-EGF1mut(S22G) | This study | N/A |
| pET19-mCherry-rTEV-FVII-EGF1mut(Y23G) | This study | N/A |
| pET19-mCherry-rTEV-FVII-EGF1mut(I24G) | This study | N/A |
| pET19-mCherry-rTEV-FVII-EGF1mut(C25G) | This study | N/A |
| pET19-mCherry-rTEV-FVII-EGF1mut(F26G) | This study | N/A |
| pET19-mCherry-rTEV-FVII-EGF1mut(C27G) | This study | N/A |
| pET19-mCherry-rTEV-FVII-EGF1mut(L28G) | This study | N/A |
| pET19-mCherry-rTEV-FVII-EGF1mut(P29G) | This study | N/A |
| pET19-mCherry-rTEV-FVII-EGF1mut(A30G) | This study | N/A |
| pET19-mCherry-rTEV-FVII-EGF1mut(F31G) | This study | N/A |
| pET19-mCherry-rTEV-FVII-EGF1mut(E32G) | This study | N/A |
| pET19-mCherry-rTEV-FVII-EGF1mut(G33A) | This study | N/A |
| pET19-mCherry-rTEV-FVII-EGF1mut(R34G) | This study | N/A |
| pET19-mCherry-rTEV-FVII-EGF1mut(N35G) | This study | N/A |
| pET19-mCherry-rTEV-FVII-EGF1mut(C36G) | This study | N/A |
| pET19-mCherry-rTEV-FVII-EGF1mut(E37G) | This study | N/A |
