# Supplementary material for: Coagulation factors VII, IX and X are effective antibacterial proteins against drug-resistant Gram-negative bacteria
Source: PubMed Central journal article supplement (PMC6796875; doi:10.1038/s41422-019-0202-3), 2019-08-09
Supplement: 41422_2019_202_MOESM14_ESM.pdf [file 41422_2019_202_MOESM14_ESM.pdf]

## Supplementary information, Table S3

**Table S3 Sequences of primers and oligos used in this study.**

| Name<br>(s: sense, as: antisense)                               | Sequence (5' to 3')                                                                                                                | Restriction Site               |
|-----------------------------------------------------------------|------------------------------------------------------------------------------------------------------------------------------------|--------------------------------|
| <b>Primers for FVII, FIX and FX cloning</b>                     |                                                                                                                                    |                                |
| FVII-s                                                          | taagctagctgcagagatttcatcatggtctcccaggccct                                                                                          | <i>Nhe</i> I                   |
| FVII-as                                                         | tccgcatccttagtggtggtggtggtggtgggaaatgggctcgcaggaggact                                                                              | <i>Bam</i> H I                 |
| FIX-s                                                           | gagaagccttgcagagatttcatcatggagttgggctgagctggcctttctgtgctgcattaagaggtgtccagtcctata<br>atcaggtaaattggaa                              | <i>Hind</i> III                |
| FIX-as                                                          | gccggatccttagtgatgatgatgatgatgacgggtgagcttagaagttg                                                                                 | <i>Bam</i> H I                 |
| FX-s                                                            | gagaagccttgcagagatttcatcatggagttgggctgagctggcctttctgtgctgcattaagaggtgtccagtcgcc<br>aattccttctgaagag                                | <i>Hind</i> III                |
| FX-as                                                           | gccggatccttagtgatgatgatgatgatggcgtccagggtctgttccc                                                                                  | <i>Bam</i> H I                 |
| <b>Primers for cloning of IFVII, IFIX, IFX and hFVII</b>        |                                                                                                                                    |                                |
| IFVII-s                                                         | taaccatggccatcatcatcatcacccaacgcgtcctggagga                                                                                        | <i>Nco</i> I                   |
| IFVII-as                                                        | tatctcagttatcggccttggggttctgctggcatt                                                                                               | <i>Xho</i> I                   |
| IFIX-s                                                          | ataccatggccatcatcatcatcattataattcaggtaaattggaag                                                                                    | <i>Nco</i> I                   |
| IFIX-as                                                         | attctcagttaacgggtgagcttagaagttgt                                                                                                   | <i>Xho</i> I                   |
| IFX-s                                                           | ataccatggccatcatcatcatcatccaattccttcttgaagag                                                                                       | <i>Nco</i> I                   |
| IFX-as                                                          | attctcagtttagcgttccagggtctgttcc                                                                                                    | <i>Xho</i> I                   |
| hFVII-s                                                         | taagctagcgcaccatgattgtgggggcaag                                                                                                    | <i>Nhe</i> I                   |
| hFVII-as                                                        | tatggatccttagtggtggtggtggtggtgggaaatgggct                                                                                          | <i>Bam</i> H I                 |
| <b>Primers for cloning of FVII-Gal, FVII-EGF1 and FVII-EGF2</b> |                                                                                                                                    |                                |
| mCherry-s                                                       | taacatatggtgagcaaggcgcaggaggata                                                                                                    | <i>Nde</i> I                   |
| mCherry-as                                                      | cctggaagtacaggtttccttgtagcctcgtc                                                                                                   | /                              |
| FVII-Gal-s                                                      | gaaaacctgtactccagggtcaattcgaagccaacgcgttctctg                                                                                      | /                              |
| FVII-Gal-as                                                     | tatggatccttaactgtaagaaatccagaacagc                                                                                                 | <i>Bam</i> H I                 |
| FVII-EGF1-s                                                     | gaaaacctgtactccagggtcaattcgaagatggggaccagtgctcctc                                                                                  | /                              |
| FVII-EGF1-as                                                    | tatggatccttactcacagttccggccctcgaa                                                                                                  | <i>Bam</i> H I                 |
| FVII-EGF2-s                                                     | gaaaacctgtactccagggtcaattcgaagcacaagatgaccagctga                                                                                   | /                              |
| FVII-EGF2-as                                                    | tatctcagttatcggccttggggttctgctggcat                                                                                                | <i>Xho</i> I                   |
| <b>Oligos for cloning of the FVII-EGF1 mutants</b>              |                                                                                                                                    |                                |
| FVII-EGF1mut(D1G)-s                                             | ttcgaaggtggggaccagtgctcctcaagtccatgccagaatggggctcctgcaaggaccagctccagtcctatatct<br>gcttctgctcctcctccttcgagggccggaactgtgagtaactcgaag | <i>Bsp</i> 119 I/ <i>Xho</i> I |
| FVII-EGF1mut(D1G)-as                                            | ctcgaagtactcacagttccggccctcgaaggcaggaggcagaagcagatataggactggagctggtccttcgaggag<br>ccccattctggcatggactgaggcacactggtccccaccttcgaa    |                                |
| FVII-EGF1mut(G2A)-s                                             | ttcgaagatgcagaccagtgctcctcaagtccatgccagaatggggctcctgcaaggaccagctccagtcctatatctg<br>cttctgctcctcctccttcgagggccggaactgtgagtaactcgaag | <i>Bsp</i> 119 I/ <i>Xho</i> I |
| FVII-EGF1mut(G2A)-as                                            | ctcgaagtactcacagttccggccctcgaaggcaggaggcagaagcagatataggactggagctggtccttcgaggag<br>ccccattctggcatggactgaggcacactggtctgcatcttcgaa    |                                |
| FVII-EGF1mut(D3G)-s                                             | ttcgaagatggggctcagtgctcctcaagtccatgccagaatggggctcctgcaaggaccagctccagtcctatatctg<br>cttctgctcctcctccttcgagggccggaactgtgagtaactcgaag | <i>Bsp</i> 119 I/ <i>Xho</i> I |
| FVII-EGF1mut(D3G)-as                                            | ctcgaagtactcacagttccggccctcgaaggcaggaggcagaagcagatataggactggagctggtccttcgaggag<br>ccccattctggcatggactgaggcacactggtccccaccttcgaa    |                                |
| FVII-EGF1mut(Q4G)-s                                             | ttcgaagatggggacggttctcctcaagtccatgccagaatggggctcctgcaaggaccagctccagtcctatatctg<br>cttctgctcctcctccttcgagggccggaactgtgagtaactcgaag  | <i>Bsp</i> 119 I/ <i>Xho</i> I |
| FVII-EGF1mut(Q4G)-as                                            | ctcgaagtactcacagttccggccctcgaaggcaggaggcagaagcagatataggactggagctggtccttcgaggag                                                     |                                |

|                        |                                                                                                                                                                                                       |                       |
|------------------------|-------------------------------------------------------------------------------------------------------------------------------------------------------------------------------------------------------|-----------------------|
| FVII-EGF1 mut(C5G)-s   | <p>ccccattctggcatggactgaggcacaaccgtcccatctcgaat</p> <p><u>tcgaagatggggaccagggtgctcaagtccatgccagaatggggctcctgcaaggaccagctccagctctatatct</u></p> <p>gcttctgctccctgccttcgagggccggaactgtgagtaactcgaag</p> | <i>Bsp119 I/Xho I</i> |
| FVII-EGF1 mut(C5G)-as  | <p><u>ctcgaagtactcacagttccggccctcgaaggcaggaggcagaagcagatataaggactggagctggctcctgcaggag</u></p> <p>ccccattctggcatggactgaggcaccctgtcccatctcgaat</p>                                                      |                       |
| FVII-EGF1 mut(A6G)-s   | <p><u>tcgaagatggggaccagtgtgctcaagtccatgccagaatggggctcctgcaaggaccagctccagctctatatctg</u></p> <p>cttctgctccctgccttcgagggccggaactgtgagtaactcgaag</p>                                                     | <i>Bsp119 I/Xho I</i> |
| FVII-EGF1 mut(A6G)-as  | <p><u>ctcgaagtactcacagttccggccctcgaaggcaggaggcagaagcagatataaggactggagctggctcctgcaggag</u></p> <p>ccccattctggcatggactgaaccacactgtcccatctcgaat</p>                                                      |                       |
| FVII-EGF1 mut(S7G)-s   | <p><u>tcgaagatggggaccagtgtgctcaagtccatgccagaatggggctcctgcaaggaccagctccagctctatatct</u></p> <p>gcttctgctccctgccttcgagggccggaactgtgagtaactcgaag</p>                                                     | <i>Bsp119 I/Xho I</i> |
| FVII-EGF1 mut(S7G)-as  | <p><u>ctcgaagtactcacagttccggccctcgaaggcaggaggcagaagcagatataaggactggagctggctcctgcaggag</u></p> <p>ccccattctggcatggactaccggcacactgtcccatctcgaat</p>                                                     |                       |
| FVII-EGF1 mut(S8G)-s   | <p><u>tcgaagatggggaccagtgtgctcaagtccatgccagaatggggctcctgcaaggaccagctccagctctatatct</u></p> <p>gcttctgctccctgccttcgagggccggaactgtgagtaactcgaag</p>                                                     | <i>Bsp119 I/Xho I</i> |
| FVII-EGF1 mut(S8G)-as  | <p><u>ctcgaagtactcacagttccggccctcgaaggcaggaggcagaagcagatataaggactggagctggctcctgcaggag</u></p> <p>ccccattctggcatggactgaggcacactgtcccatctcgaat</p>                                                      |                       |
| FVII-EGF1 mut(P9G)-s   | <p><u>tcgaagatggggaccagtgtgctcaagtccatgccagaatggggctcctgcaaggaccagctccagctctatatctg</u></p> <p>cttctgctccctgccttcgagggccggaactgtgagtaactcgaag</p>                                                     | <i>Bsp119 I/Xho I</i> |
| FVII-EGF1 mut(P9G)-as  | <p><u>ctcgaagtactcacagttccggccctcgaaggcaggaggcagaagcagatataaggactggagctggctcctgcaggag</u></p> <p>ccccattctggcaaccactgaggcacactgtcccatctcgaat</p>                                                      |                       |
| FVII-EGF1 mut(C10G)-s  | <p><u>tcgaagatggggaccagtgtgctcaagtccatgccagaatggggctcctgcaaggaccagctccagctctatatctg</u></p> <p>gcttctgctccctgccttcgagggccggaactgtgagtaactcgaag</p>                                                    | <i>Bsp119 I/Xho I</i> |
| FVII-EGF1 mut(C10G)-as | <p><u>ctcgaagtactcacagttccggccctcgaaggcaggaggcagaagcagatataaggactggagctggctcctgcaggag</u></p> <p>ccccattctgacctggactgaggcacactgtcccatctcgaat</p>                                                      |                       |
| FVII-EGF1 mut(Q11G)-s  | <p><u>tcgaagatggggaccagtgtgctcaagtccatgccagaatggggctcctgcaaggaccagctccagctctatatctg</u></p> <p>cttctgctccctgccttcgagggccggaactgtgagtaactcgaag</p>                                                     | <i>Bsp119 I/Xho I</i> |
| FVII-EGF1 mut(Q11G)-as | <p><u>ctcgaagtactcacagttccggccctcgaaggcaggaggcagaagcagatataaggactggagctggctcctgcaggag</u></p> <p>ccccattaccgcatggactgaggcacactgtcccatctcgaat</p>                                                      |                       |
| FVII-EGF1 mut(N12G)-s  | <p><u>tcgaagatggggaccagtgtgctcaagtccatgccagaatggggctcctgcaaggaccagctccagctctatatct</u></p> <p>gcttctgctccctgccttcgagggccggaactgtgagtaactcgaag</p>                                                     | <i>Bsp119 I/Xho I</i> |
| FVII-EGF1 mut(N12G)-as | <p><u>ctcgaagtactcacagttccggccctcgaaggcaggaggcagaagcagatataaggactggagctggctcctgcaggag</u></p> <p>ccccaccctggcatggactgaggcacactgtcccatctcgaat</p>                                                      |                       |
| FVII-EGF1 mut(G13A)-s  | <p><u>tcgaagatggggaccagtgtgctcaagtccatgccagaatggggctcctgcaaggaccagctccagctctatatctg</u></p> <p>cttctgctccctgccttcgagggccggaactgtgagtaactcgaag</p>                                                     | <i>Bsp119 I/Xho I</i> |
| FVII-EGF1 mut(G13A)-as | <p><u>ctcgaagtactcacagttccggccctcgaaggcaggaggcagaagcagatataaggactggagctggctcctgcaggag</u></p> <p>cctgcatctggcatggactgaggcacactgtcccatctcgaat</p>                                                      |                       |
| FVII-EGF1 mut(G14A)-s  | <p><u>tcgaagatggggaccagtgtgctcaagtccatgccagaatggggctcctgcaaggaccagctccagctctatatctg</u></p> <p>cttctgctccctgccttcgagggccggaactgtgagtaactcgaag</p>                                                     | <i>Bsp119 I/Xho I</i> |
| FVII-EGF1 mut(G14A)-as | <p><u>ctcgaagtactcacagttccggccctcgaaggcaggaggcagaagcagatataaggactggagctggctcctgcaggat</u></p> <p>gccccattctggcatggactgaggcacactgtcccatctcgaat</p>                                                     |                       |
| FVII-EGF1 mut(S15G)-s  | <p><u>tcgaagatggggaccagtgtgctcaagtccatgccagaatggggctcctgcaaggaccagctccagctctatatct</u></p> <p>gcttctgctccctgccttcgagggccggaactgtgagtaactcgaag</p>                                                     | <i>Bsp119 I/Xho I</i> |
| FVII-EGF1 mut(S15G)-as | <p><u>ctcgaagtactcacagttccggccctcgaaggcaggaggcagaagcagatataaggactggagctggctcctgcaaccg</u></p> <p>ccccattctggcatggactgaggcacactgtcccatctcgaat</p>                                                      |                       |
| FVII-EGF1 mut(C16G)-s  | <p><u>tcgaagatggggaccagtgtgctcaagtccatgccagaatggggctcctgcaaggaccagctccagctctatatct</u></p> <p>gcttctgctccctgccttcgagggccggaactgtgagtaactcgaag</p>                                                     | <i>Bsp119 I/Xho I</i> |
| FVII-EGF1 mut(C16G)-as | <p><u>ctcgaagtactcacagttccggccctcgaaggcaggaggcagaagcagatataaggactggagctggctcctaccggag</u></p>                                                                                                         |                       |

|                        |                                                                                                                                                                                                                         |                       |
|------------------------|-------------------------------------------------------------------------------------------------------------------------------------------------------------------------------------------------------------------------|-----------------------|
| FVII-EGF1 mut(K17G)-s  | <p>ccccattctggcatggactfgaggcacactggtcccatctcga</p> <p><u>ttcgaagatggggaccagtgtgctcaagtcctatgccagaatggggctcctg</u><br/> <u>cggtgaccagctccagtcctatatctg</u><br/> <u>cttctgcctccctgccttcgagggccggaactgtgagtaactcga</u></p> | <i>Bsp119 I/Xho I</i> |
| FVII-EGF1 mut(K17G)-as | <p><u>ctcga</u>gttactcacagttccggccctcgaaggcaggaggcagaagcagatataggactggagctggtcaccgcagga</p> <p>gccccattctggcatggactfgaggcacactggtcccatctcga</p>                                                                         |                       |
| FVII-EGF1 mut(D18G)-s  | <p><u>ttcgaagatggggaccagtgtgctcaagtcctatgccagaatggggctcctg</u><br/> <u>caagggtcagctccagtcctatatctg</u><br/> <u>cttctgcctccctgccttcgagggccggaactgtgagtaactcga</u></p>                                                    | <i>Bsp119 I/Xho I</i> |
| FVII-EGF1 mut(D18G)-as | <p><u>ctcga</u>gttactcacagttccggccctcgaaggcaggaggcagaagcagatataggactggagctgacccttcgagga</p> <p>gccccattctggcatggactfgaggcacactggtcccatctcga</p>                                                                         |                       |
| FVII-EGF1 mut(Q19G)-s  | <p><u>ttcgaagatggggaccagtgtgctcaagtcctatgccagaatggggctcctg</u><br/> <u>caaggacggtcctcagtcctatatctg</u><br/> <u>cttctgcctccctgccttcgagggccggaactgtgagtaactcga</u></p>                                                    | <i>Bsp119 I/Xho I</i> |
| FVII-EGF1 mut(Q19G)-as | <p><u>ctcga</u>gttactcacagttccggccctcgaaggcaggaggcagaagcagatataggactggagaccgtccttcgagga</p> <p>gccccattctggcatggactfgaggcacactggtcccatctcga</p>                                                                         |                       |
| FVII-EGF1 mut(L20G)-s  | <p><u>ttcgaagatggggaccagtgtgctcaagtcctatgccagaatggggctcctg</u><br/> <u>caaggaccaggtcagtcctatatct</u><br/> <u>gcttctgcctccctgccttcgagggccggaactgtgagtaactcga</u></p>                                                     | <i>Bsp119 I/Xho I</i> |
| FVII-EGF1 mut(L20G)-as | <p><u>ctcga</u>gttactcacagttccggccctcgaaggcaggaggcagaagcagatataggactgaccctggtccttcgaggag</p> <p>ccccattctggcatggactfgaggcacactggtcccatctcga</p>                                                                         |                       |
| FVII-EGF1 mut(Q21G)-s  | <p><u>ttcgaagatggggaccagtgtgctcaagtcctatgccagaatggggctcctg</u><br/> <u>caaggaccagctcgttcctatatctg</u><br/> <u>cttctgcctccctgccttcgagggccggaactgtgagtaactcga</u></p>                                                     | <i>Bsp119 I/Xho I</i> |
| FVII-EGF1 mut(Q21G)-as | <p><u>ctcga</u>gttactcacagttccggccctcgaaggcaggaggcagaagcagatataggaaaccgagctggtccttcgagga</p> <p>gccccattctggcatggactfgaggcacactggtcccatctcga</p>                                                                        |                       |
| FVII-EGF1 mut(S22G)-s  | <p><u>ttcgaagatggggaccagtgtgctcaagtcctatgccagaatggggctcctg</u><br/> <u>caaggaccagctccagtggtatatct</u><br/> <u>gcttctgcctccctgccttcgagggccggaactgtgagtaactcga</u></p>                                                    | <i>Bsp119 I/Xho I</i> |
| FVII-EGF1 mut(S22G)-as | <p><u>ctcga</u>gttactcacagttccggccctcgaaggcaggaggcagaagcagatataccctggagctggtccttcgaggag</p> <p>ccccattctggcatggactfgaggcacactggtcccatctcga</p>                                                                          |                       |
| FVII-EGF1 mut(Y23G)-s  | <p><u>ttcgaagatggggaccagtgtgctcaagtcctatgccagaatggggctcctg</u><br/> <u>caaggaccagctccagtcctatatctg</u><br/> <u>gcttctgcctccctgccttcgagggccggaactgtgagtaactcga</u></p>                                                   | <i>Bsp119 I/Xho I</i> |
| FVII-EGF1 mut(Y23G)-as | <p><u>ctcga</u>gttactcacagttccggccctcgaaggcaggaggcagaagcagatataccggactggagctggtccttcgagga</p> <p>gccccattctggcatggactfgaggcacactggtcccatctcga</p>                                                                       |                       |
| FVII-EGF1 mut(I24G)-s  | <p><u>ttcgaagatggggaccagtgtgctcaagtcctatgccagaatggggctcctg</u><br/> <u>caaggaccagctccagtcctatggtt</u><br/> <u>gcttctgcctccctgccttcgagggccggaactgtgagtaactcga</u></p>                                                    | <i>Bsp119 I/Xho I</i> |
| FVII-EGF1 mut(I24G)-as | <p><u>ctcga</u>gttactcacagttccggccctcgaaggcaggaggcagaagcaaccatagactggagctggtccttcgagga</p> <p>gccccattctggcatggactfgaggcacactggtcccatctcga</p>                                                                          |                       |
| FVII-EGF1 mut(C25G)-s  | <p><u>ttcgaagatggggaccagtgtgctcaagtcctatgccagaatggggctcctg</u><br/> <u>caaggaccagctccagtcctatatctg</u><br/> <u>gtttctgcctccctgccttcgagggccggaactgtgagtaactcga</u></p>                                                   | <i>Bsp119 I/Xho I</i> |
| FVII-EGF1 mut(C25G)-as | <p><u>ctcga</u>gttactcacagttccggccctcgaaggcaggaggcagaaccgatataggactggagctggtccttcgaggag</p> <p>ccccattctggcatggactfgaggcacactggtcccatctcga</p>                                                                          |                       |
| FVII-EGF1 mut(F26G)-s  | <p><u>ttcgaagatggggaccagtgtgctcaagtcctatgccagaatggggctcctg</u><br/> <u>caaggaccagctccagtcctatatctg</u><br/> <u>cggttgcctccctgccttcgagggccggaactgtgagtaactcga</u></p>                                                    | <i>Bsp119 I/Xho I</i> |
| FVII-EGF1 mut(F26G)-as | <p><u>ctcga</u>gttactcacagttccggccctcgaaggcaggaggcagaaccgagatataggactggagctggtccttcgaggag</p> <p>ccccattctggcatggactfgaggcacactggtcccatctcga</p>                                                                        |                       |
| FVII-EGF1 mut(C27G)-s  | <p><u>ttcgaagatggggaccagtgtgctcaagtcctatgccagaatggggctcctg</u><br/> <u>caaggaccagctccagtcctatatctg</u><br/> <u>cttcggtcctccctgccttcgagggccggaactgtgagtaactcga</u></p>                                                   | <i>Bsp119 I/Xho I</i> |
| FVII-EGF1 mut(C27G)-as | <p><u>ctcga</u>gttactcacagttccggccctcgaaggcaggaggaccgaagcagatataggactggagctggtccttcgaggag</p> <p>ccccattctggcatggactfgaggcacactggtcccatctcga</p>                                                                        |                       |
| FVII-EGF1 mut(L28G)-s  | <p><u>ttcgaagatggggaccagtgtgctcaagtcctatgccagaatggggctcctg</u><br/> <u>caaggaccagctccagtcctatatctg</u><br/> <u>cttctgcgtcctgccttcgagggccggaactgtgagtaactcga</u></p>                                                     | <i>Bsp119 I/Xho I</i> |
| FVII-EGF1 mut(L28G)-as | <p><u>ctcga</u>gttactcacagttccggccctcgaaggcaggaccgagaagcagatataggactggagctggtccttcgaggag</p>                                                                                                                            |                       |

|                        |                                                                                                                                                                                                   |                       |
|------------------------|---------------------------------------------------------------------------------------------------------------------------------------------------------------------------------------------------|-----------------------|
| FVII-EGF1 mut(P29G)-s  | <p>ccccattctgcatggactgaggcacactggtccccatctcga</p> <p><u>ttcgaagatgggaccagtgtgctcaagtccatgccagaatggggctcctgcaaggaccagctccagctctatatctg</u></p> <p>cttctgctcctggtgcttcgaggccggaactgtgagtaactcga</p> | <i>Bsp119 I/Xho I</i> |
| FVII-EGF1 mut(P29G)-as | <p><u>ctcgaagtactcacagttccggccctcgaaggcaccgaggcagaagcagatataggactggagctggtcctgcaggag</u></p> <p>ccccattctgcatggactgaggcacactggtccccatctcga</p>                                                    |                       |
| FVII-EGF1 mut(A30G)-s  | <p><u>ttcgaagatgggaccagtgtgctcaagtccatgccagaatggggctcctgcaaggaccagctccagctctatatctg</u></p> <p>cttctgctcctggttctgaggccggaactgtgagtaactcga</p>                                                     | <i>Bsp119 I/Xho I</i> |
| FVII-EGF1 mut(A30G)-as | <p><u>ctcgaagtactcacagttccggccctcgaaccaggaggcagaagcagatataggactggagctggtcctgcaggag</u></p> <p>ccccattctgcatggactgaggcacactggtccccatctcga</p>                                                      |                       |
| FVII-EGF1 mut(F31G)-s  | <p><u>ttcgaagatgggaccagtgtgctcaagtccatgccagaatggggctcctgcaaggaccagctccagctctatatctg</u></p> <p>cttctgctcctgcccgtgaggccggaactgtgagtaactcga</p>                                                     | <i>Bsp119 I/Xho I</i> |
| FVII-EGF1 mut(F31G)-as | <p><u>ctcgaagtactcacagttccggccctcaccggcaggaggcagaagcagatataggactggagctggtcctgcaggag</u></p> <p>ccccattctgcatggactgaggcacactggtccccatctcga</p>                                                     |                       |
| FVII-EGF1 mut(E32G)-s  | <p><u>ttcgaagatgggaccagtgtgctcaagtccatgccagaatggggctcctgcaaggaccagctccagctctatatctg</u></p> <p>cttctgctcctgcttcggtgcccgaactgtgagtaactcga</p>                                                      | <i>Bsp119 I/Xho I</i> |
| FVII-EGF1 mut(E32G)-as | <p><u>ctcgaagtactcacagttccggccaccgaaggcaggaggcagaagcagatataggactggagctggtcctgcaggag</u></p> <p>gccccattctgcatggactgaggcacactggtccccatctcga</p>                                                    |                       |
| FVII-EGF1 mut(G33A)-s  | <p><u>ttcgaagatgggaccagtgtgctcaagtccatgccagaatggggctcctgcaaggaccagctccagctctatatctg</u></p> <p>cttctgctcctgcttcgaggcacggaactgtgagtaactcga</p>                                                     | <i>Bsp119 I/Xho I</i> |
| FVII-EGF1 mut(G33A)-as | <p><u>ctcgaagtactcacagttccgtcctcgaaggcaggaggcagaagcagatataggactggagctggtcctgcaggag</u></p> <p>ccccattctgcatggactgaggcacactggtccccatctcga</p>                                                      |                       |
| FVII-EGF1 mut(R34G)-s  | <p><u>ttcgaagatgggaccagtgtgctcaagtccatgccagaatggggctcctgcaaggaccagctccagctctatatctg</u></p> <p>cttctgctcctgcttcgaggccggtgagtaactcga</p>                                                           | <i>Bsp119 I/Xho I</i> |
| FVII-EGF1 mut(R34G)-as | <p><u>ctcgaagtactcacagttaccgcccctcgaaggcaggaggcagaagcagatataggactggagctggtcctgcaggag</u></p> <p>ccccattctgcatggactgaggcacactggtccccatctcga</p>                                                    |                       |
| FVII-EGF1 mut(N35G)-s  | <p><u>ttcgaagatgggaccagtgtgctcaagtccatgccagaatggggctcctgcaaggaccagctccagctctatatctg</u></p> <p>cttctgctcctgcttcgaggccgggtgagtaactcga</p>                                                          | <i>Bsp119 I/Xho I</i> |
| FVII-EGF1 mut(N35G)-as | <p><u>ctcgaagtactcacaacccggcccctcgaaggcaggaggcagaagcagatataggactggagctggtcctgcaggag</u></p> <p>gccccattctgcatggactgaggcacactggtccccatctcga</p>                                                    |                       |
| FVII-EGF1 mut(C36G)-s  | <p><u>ttcgaagatgggaccagtgtgctcaagtccatgccagaatggggctcctgcaaggaccagctccagctctatatctg</u></p> <p>cttctgctcctgcttcgaggccggaacgtgagtaactcga</p>                                                       | <i>Bsp119 I/Xho I</i> |
| FVII-EGF1 mut(C36G)-as | <p><u>ctcgaagtactcacagttccggccctcgaaggcaggaggcagaagcagatataggactggagctggtcctgcaggag</u></p> <p>gccccattctgcatggactgaggcacactggtccccatctcga</p>                                                    |                       |
| FVII-EGF1 mut(E37G)-s  | <p><u>ttcgaagatgggaccagtgtgctcaagtccatgccagaatggggctcctgcaaggaccagctccagctctatatctg</u></p> <p>cttctgctcctgcttcgaggccggaactgtggttaactcga</p>                                                      | <i>Bsp119 I/Xho I</i> |
| FVII-EGF1 mut(E37G)-as | <p><u>ctcgaagttaaccagttccggcccctcgaaggcaggaggcagaagcagatataggactggagctggtcctgcaggag</u></p> <p>gccccattctgcatggactgaggcacactggtccccatctcga</p>                                                    |                       |
